# Supplementary material for: MiR-1188 at the imprinted Dlk1-Dio3 domain acts as a tumor suppressor in hepatoma cells
Source: PubMed Central journal article supplement — Mol Biol Cell. 2015 Apr 15;26(8):1416–27. doi: 10.1091/mbc.E14-11-1576 (PMC4395123; doi:10.1091/mbc.e14-11-1576), 2015-04-15
Supplement: supp_E14-11-1576v1_CombinedSupMats.pdf [file supp_E14-11-1576v1_CombinedSupMats.pdf]

# Supplemental Materials

*Molecular Biology of the Cell*

Cui et al.

## Tables

**Supporting Information Table S1. Primers used in this study.**

| Primer (F/R) | Sequences (5'-3' F/R)                                                            |
|--------------|----------------------------------------------------------------------------------|
| Bcl2-qRT-PCR | CCACCCCTGGCATCTTCT/<br>CACGACGGTAGCGACGAG                                        |
| Sp1-qRT-PCR  | ACTGTGAATGCTGCTCAACTCT/<br>TTCCTTCTCCACCTGCTGT                                   |
| Bcl2-3'UTR   | <u>GGACTAGTTTGCTCTAAAAGTAGTTGGTGATG/</u><br><u>CCCAAGCTTGAGGAGGTGAGATTTGGGTG</u> |
| Sp1-3'UTR    | <u>GGACTAGTAAGTTATCTGTCCTCAGCCACC/</u><br><u>CCCAAGCTTTTATCCTGCCCTCTTCCTCC</u>   |
| Bcl2-MUT     | AGTGTCCCAAATCTCACCTCCTC/<br>GGCCCTTCTGAAATATGAACTACATG                           |
| Sp1-MUT      | GTGTGCTTTTATTCCTAAAGAAAAGC/<br>ATGGTGGCTGAGGACAGATAACTT                          |

**Supporting Information Table S2. miRNAs and siRNAs.**

| Genes                            | Sequences (5'-3' F/R)                                  |
|----------------------------------|--------------------------------------------------------|
| miR-1188                         | UGGUGUGAGGUUGGGCCAGGA/                                 |
| mimics                           | CUGGCCCAACCUCACACCAUU                                  |
| miR-1188 inhibitor               | UCCUGGCCCAACCUCACACCA                                  |
| Stable Negative Control<br>(SNC) | UUCUCCGAACGUGUCACGUTT/<br>ACGUGACACGUUCGGAGAATT        |
| Negative Control (NC)            | CAGUACUUUUGUGUAGUACAA                                  |
| Bcl2                             | 1803 GGAGGAACUCUUCAGGGAUTT/<br>AUCCCUGAAGAGUUCCUCCTT   |
| siRNAs                           | 1926 GGAUGACUGAGUACCUGAATT/<br>UUCAGGUACUCAGUCAUCCTT   |
|                                  | 2014 CAUGCAGACCUCUGUUUGAUTT/<br>AUCAAACAGAGGUCGCAUGTT  |
|                                  | 588 CCUGGAGUAAUGCCUAAUATT/<br>UAUUAGGCAUUACUCCAGGTT    |
| Sp1                              | 1093 CCAGCAACAUGGGAAUUAUTT/<br>AUAAUCCCAUGUUGCUGGTT    |
| siRNAs                           | 2406 GAGCUGCAGUCCAUAUAAUATT/<br>UAUUA AUGGACUGCAGCUCTT |
